# Supplementary material for: Systematic studies of Pickering emulsions stabilized by uniform-sized PLGA particles: preparation and stabilization mechanism
Source: Royal Society of Chemistry journal article supplement (doi:10.1039/c4tb01165a), 2014-08-18
Supplement: c4tb01165a1.pdf [file c4tb01165a1.pdf]

# Systematic Studies of Pickering Emulsions Stabilized by Uniform-sized PLGA Particles: Preparation and Stabilization Mechanism

## Supporting Information

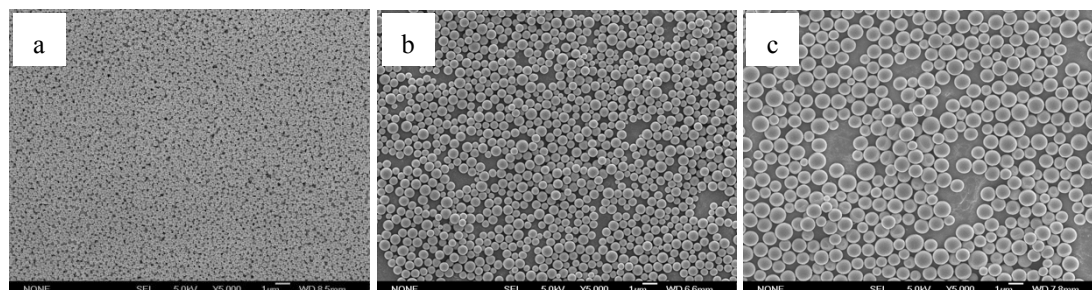

Figure S1. SEM photos of PLGA particles ( $M_w$  13 kDa) with size of (a) 330 nm, (b) 620 nm and (c) 1150 nm prepared by SPG premix membrane emulsification.

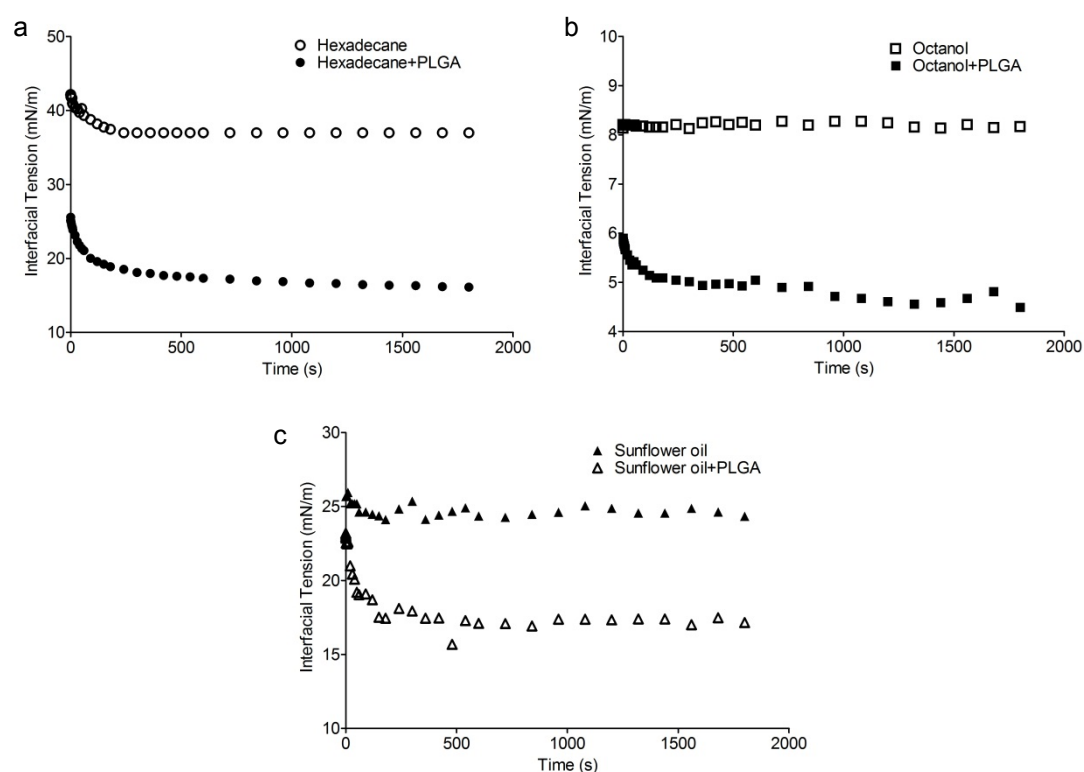

Figure S2. IFT between different oil types and water absorbed by PLGA particles ( $M_w$  13 kDa, 620 nm) as a function of time, (a) hexadecane, (b) octanol and (c) sunflower oil.
